# Supplementary material for: A novel universal nano-luciferase-involved reporter system for long-term probing food-borne probiotics and pathogenic bacteria in mice by in situ bioluminescence imaging
Source: Royal Society of Chemistry journal article supplement (doi:10.1039/d0ra01283a), 2020-01-01
Supplement: d0ra01283a1.pdf [file d0ra01283a1.pdf]

## Supplementary Material

### **A novel universal nano-luciferase-involved reporter system for long-term probing the food-borne probiotics and pathogenic bacteria in mice by *in-situ* bioluminescence imaging**

Ning Zhao<sup>†</sup>, Jing-Min Liu<sup>†</sup>, Shuang Liu, Xue-Meng Ji, Huan Lv, Yao-Zhong Hu, Zhi-Hao Wang, Shi-Wen Lv, Chun-Yang Li, Shuo Wang\*

Tianjin Key Laboratory of Food Science and Health, School of Medicine, Nankai University, Tianjin 300071, China

<sup>†</sup>These authors have contributed equally to this work.

---

\*Corresponding author.

Mail to: No.94 Weijin Road, Tianjin, 300071, China.

Email: [wangshuo@nankai.edu.cn](mailto:wangshuo@nankai.edu.cn) (Shuo Wang)

Tel: +86-22-85358445

## The Relationship Between Colony Number and Bioluminescence Intensity

Recombinant bacteria were cultured overnight, transferred to new medium to grow to log phase, and then gradient diluted with sterile phosphate-buffered saline (PBS). Each dilution was plated in MRS agar plate, supplemented with 10  $\mu\text{g}/\text{mL}$  chloramphenicol, or in LB agar plate, supplemented with 200  $\mu\text{g}/\text{mL}$  ampicillin for CFU counts. At the same time, bioluminescence reading of each dilution was measured using plate reader (Spark Tecan, Switzerland). The bioluminescence data were correlated with bacteria counts.

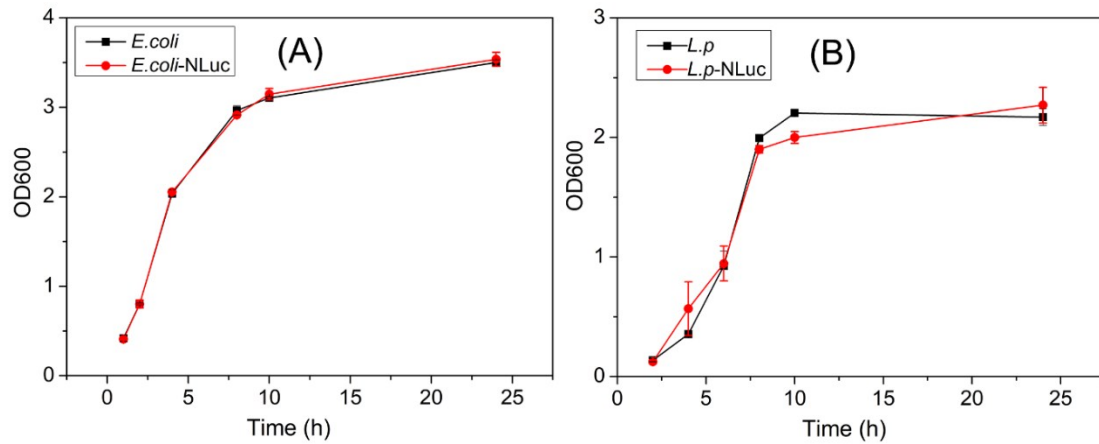

Fig. S1 Growth curve of recombinant bacteria and wild types: (A) *E. coli*-NLuc and *E. coli*. (B) *L. plantarum*-NLuc and *L. plantarum*. Data and error bars represent the mean and standard deviation of three samples at each time point.

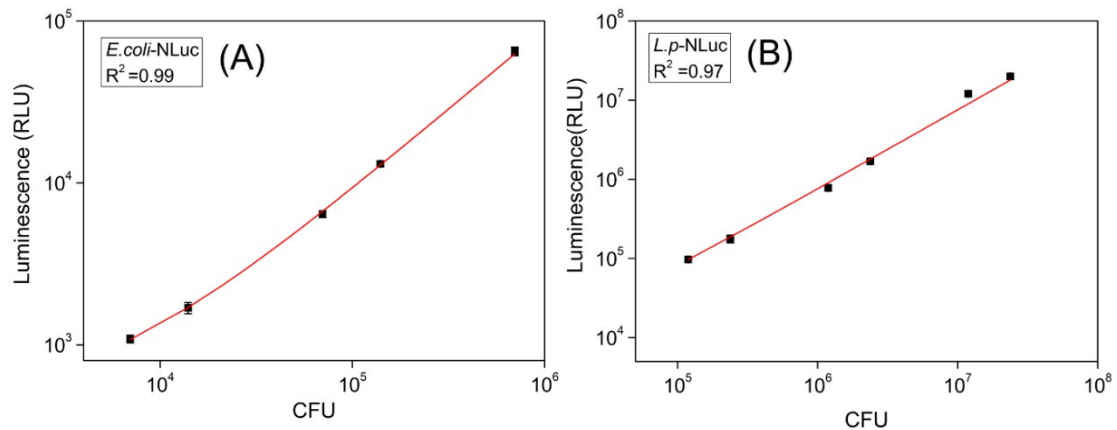

Fig. S2 Relationship between bacterial counts and the bioluminescence of (A) *E. coli*-NLuc and (B) *L. plantarum*-NLuc. Data and error bars represent the mean and standard deviation of three samples at each time point.
